# Supplementary material
Source: PubMed Central journal article supplement (PMC3281605)
Supplement: supp_M111.249649_jbc.M111.249649-2.pdf [file supp_M111.249649_jbc.M111.249649-2.pdf]

| Joint       | Age      | Gender   |                            | Total Extracted | Gu-HCl Extraction 1 |          | Gu-HCl Extraction 2 |         | Gu-HCl Extraction 3 |         | Gu-HCl Extraction 4 |         | Gu-HCl Extraction 5 |         |   |
|-------------|----------|----------|----------------------------|-----------------|---------------------|----------|---------------------|---------|---------------------|---------|---------------------|---------|---------------------|---------|---|
|             |          |          |                            |                 | µg/mg               | %        | µg/mg               | %       | µg/mg               | %       | µg/mg               | %       | µg/mg               | %       |   |
| Hip         | 69       | Female   | GAG ug/mg of cartilage     | 281.7           | 279.2               | 99.1     | 1.1                 | 0.4     | 0.5                 | 0.2     | 0.5                 | 0.2     | 0.4                 | 0.2     |   |
|             |          |          |                            | 259.5           | 257.4               | 99.2     | 0.8                 | 0.3     | 0.5                 | 0.2     | 0.4                 | 0.1     | 0.4                 | 0.2     |   |
|             |          |          |                            | 297.5           | 295.2               | 99.2     | 0.9                 | 0.3     | 0.5                 | 0.2     | 0.5                 | 0.2     | 0.4                 | 0.1     |   |
|             |          |          | Average ±SD                | 279.6±19.1      | 277.2±19.0          | 99.2±0.1 | 0.9±0.2             | 0.3±0.1 | 0.5±0.0             | 0.2±0.0 | 0.5±0.1             | 0.2±0.0 | 0.4±0.0             | 0.2±0.0 |   |
|             |          |          | Protein ug/mg of cartilage | 15.0            | 15.0                | 100.0    | -                   | -       | -                   | -       | -                   | -       | -                   | -       | - |
|             |          |          |                            | 13.3            | 13.3                | 100.0    | -                   | -       | -                   | -       | -                   | -       | -                   | -       | - |
| 14.2        | 14.2     | 100.0    |                            | -               | -                   | -        | -                   | -       | -                   | -       | -                   | -       |                     |         |   |
| Average ±SD | 14.2±0.9 | 14.2±0.9 | 100.0±0.0                  | -               | -                   | -        | -                   | -       | -                   | -       | -                   | -       |                     |         |   |
| Knee        | 77       | male     | GAG ug/mg of cartilage     | 185.5           | 182.5               | 98.4     | 1.1                 | 0.6     | 0.6                 | 0.3     | 0.6                 | 0.3     | 0.6                 | 0.3     |   |
|             |          |          |                            | 200.7           | 197.7               | 98.5     | 1.1                 | 0.5     | 0.6                 | 0.3     | 0.6                 | 0.3     | 0.6                 | 0.3     |   |
|             |          |          |                            | 197.0           | 194.0               | 98.5     | 1.2                 | 0.6     | 0.6                 | 0.3     | 0.5                 | 0.3     | 0.6                 | 0.3     |   |
|             |          |          | Average ±SD                | 194.4±7.9       | 191.4±7.9           | 98.5±0.1 | 1.1±0.1             | 0.6±0.0 | 0.6±0.0             | 0.3±0.0 | 0.6±0.1             | 0.3±0.0 | 0.6±0.0             | 0.3±0.0 |   |
|             |          |          | Protein ug/mg of cartilage | 10.8            | 10.8                | 100.0    | -                   | -       | -                   | -       | -                   | -       | -                   | -       | - |
|             |          |          |                            | 11.2            | 11.2                | 100.0    | -                   | -       | -                   | -       | -                   | -       | -                   | -       | - |
| 9.4         | 9.4      | 100.0    |                            | -               | -                   | -        | -                   | -       | -                   | -       | -                   | -       |                     |         |   |
| Average ±SD | 10.5±0.9 | 10.5±0.9 | 100.0±0.0                  | -               | -                   | -        | -                   | -       | -                   | -       | -                   | -       |                     |         |   |

**Supplemental Table 1. Data from cartilage extraction optimization experiments demonstrating highly efficient extraction of soluble proteins from cartilage with a single Gu-HCl incubation.** Two non-OA cartilage samples were extracted in triplicate with five sequential Gu-HCl extractions to determine the efficiency of the extraction protocol. Total protein was determined using the Bradford protein assay and total glycosaminoglycan (GAG) was determined using the dimethylmethylene blue (DMMB assay). Results were normalized to cartilage wet weight.

| Modified Peptide Sequence                                           | Charge State | Monoisotopic m/z | Peak Centroid Time | HIP OA peak intensity                | Knee OA peak intensity | Control peak intensity |        |
|---------------------------------------------------------------------|--------------|------------------|--------------------|--------------------------------------|------------------------|------------------------|--------|
| <i>Insoluble</i>                                                    |              |                  |                    |                                      |                        |                        |        |
| <b>N</b> TVMECDACGMQSVR<br>(estimated % of Total Cartilage Content) | 2            | 943.38727        | 36.648             | 57,802<br>(3.0%)                     | 27,302<br>(50.3%)      | 144,711<br>(20.2%)     |        |
| <b>D</b> TVMECDACGMQSVR                                             | 2            | 943.8796         |                    | none detected                        | none detected          | none detected          |        |
| <i>Soluble (Gu-HCl extract)</i>                                     |              |                  |                    |                                      |                        |                        |        |
| <b>N</b> TVMECDACGMQSVR                                             | 2            | 943.3874         | 44.807             | 1,861,624                            | 27,015                 | 572,066                |        |
| <b>D</b> TVMECDACGMQSVR                                             | 2            | 943.8796         | 46.666             | 384,398                              | 8                      | 106,304                |        |
|                                                                     |              |                  |                    | Ratio (D/N COMP) in soluble fraction | 0.2065                 | 0.0003                 | 0.1858 |

**Supplemental Table 2. Native COMP but not deamidated COMP is detected in the insoluble fraction of cartilage after extraction with Gu-HCl.** *Three cartilage samples [hip OA lesional (72 years), knee OA lesional (75 years) and on non-OA hip (76 years)] were extracted with Gu-HCl as per our standard protocol to yield soluble proteins (Gu-HCl extractable) and insoluble residual proteins. The soluble protein fractions were prepared for LC-MS/MS by extensive dialysis over 3 days at 4°C with 5 changes of 50 mM ammonium bicarbonate, pH7.8, per day. The insoluble cartilage protein fractions were also similarly washed to remove the Gu-HCl. Samples were trypsinized using standard protocols and separated by LC-MS/MS on a Waters Synapt G2 mass spectrometer. Data were aligned and label-free quantification and integration of qualitative peptide identifications was performed using Rosetta Elucidator (v 3.3, Rosetta Inpharmatics, Seattle, WA). Peptides corresponding to native (non-deamidated) COMP (N<sub>64</sub>TVMECDACGMQSVR) and deamidated D-COMP (D<sub>64</sub>TVMECDACGMQSVR) were identified in the soluble fractions but only native COMP was identified in the non-soluble cartilage protein fraction. The proportion of native COMP remaining in cartilage after extraction was estimated based on the total yield of the soluble and insoluble fractions from each sample. The ratios of the intensity of the Deamidated/Native COMP peptide in the soluble protein fractions confirmed the abundance of extractable deamidated COMP from hip compared with knee cartilage.*
